# Supplementary material
Source: PubMed Central journal article supplement (PMC1182464)

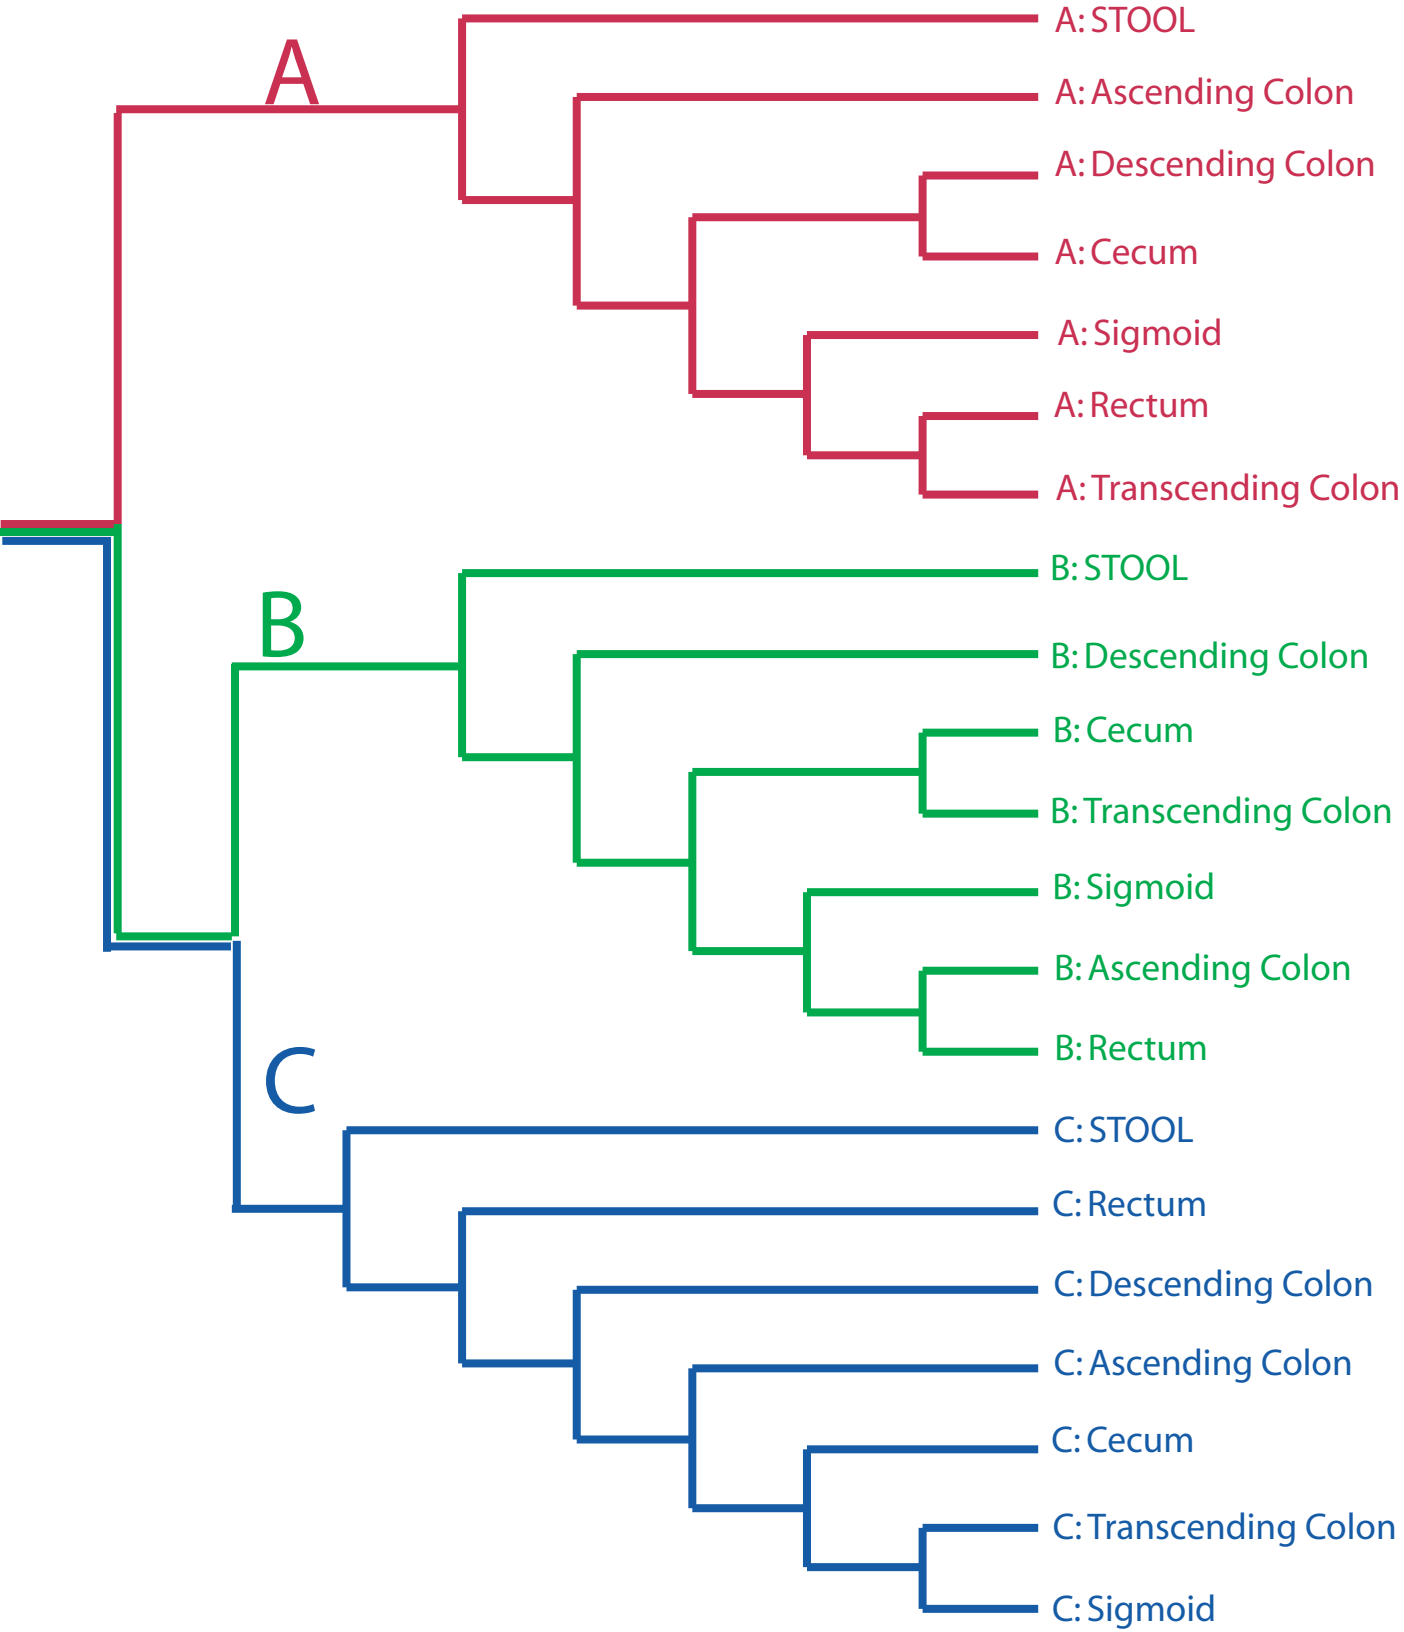

Supplement: pnas_0504978102_1.pdf [file pnas_0504978102_1.pdf]
