# Supplementary material
Source: PubMed Central journal article supplement (PMC1182464)

A

## Unweighted UniFrac

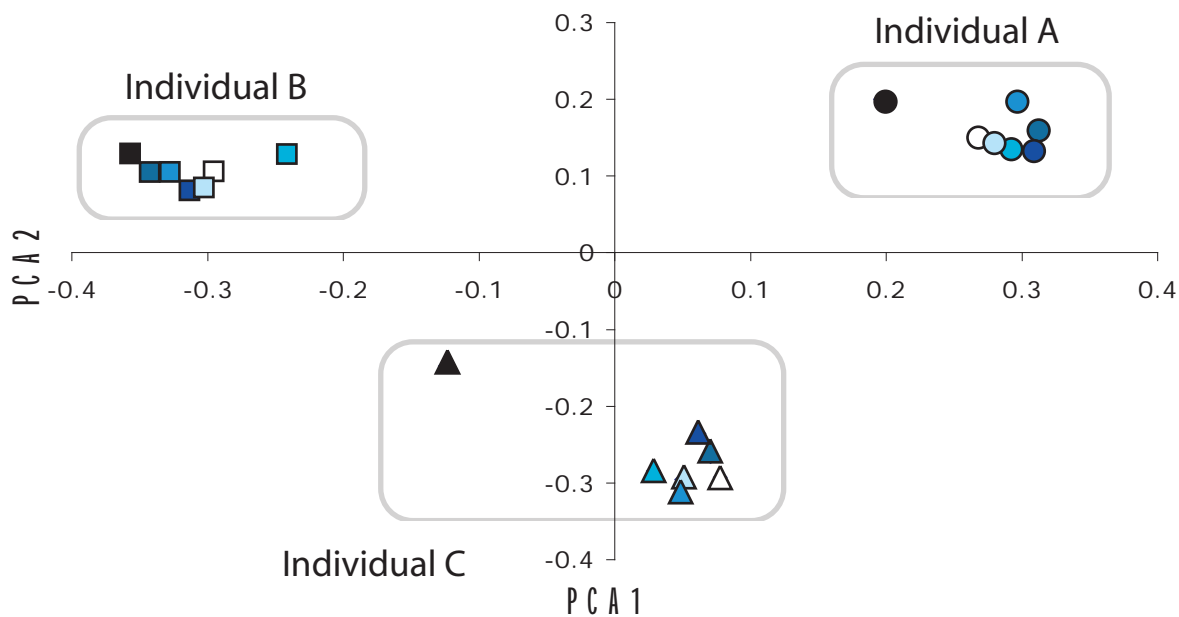

B

## Weighted UniFrac

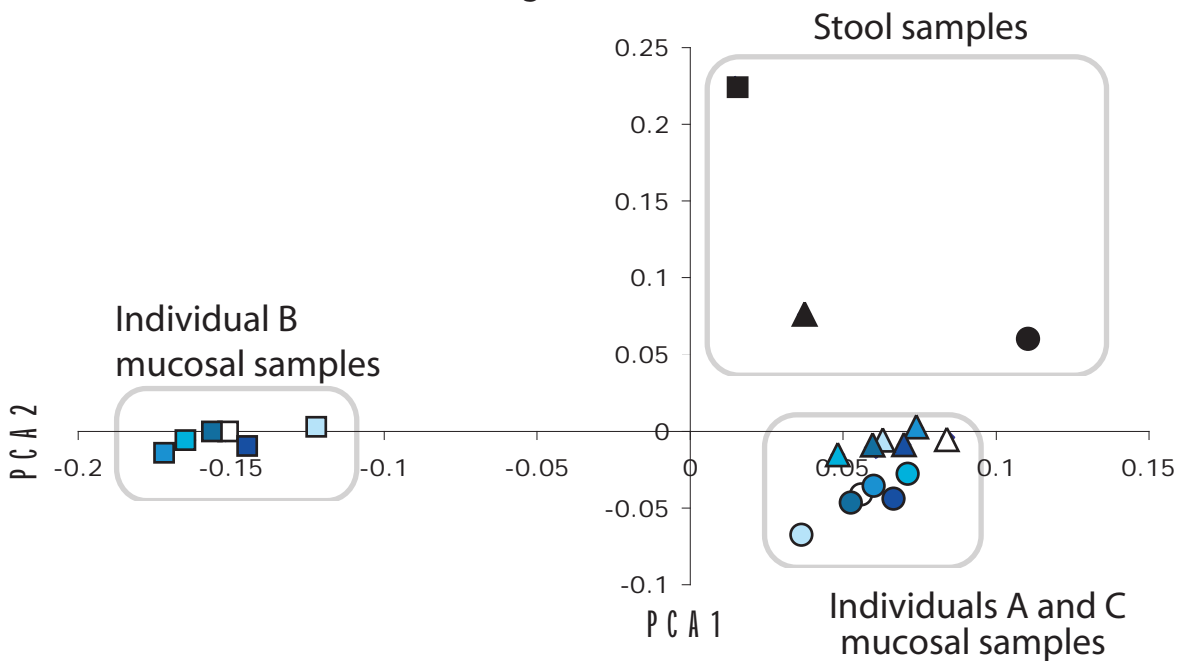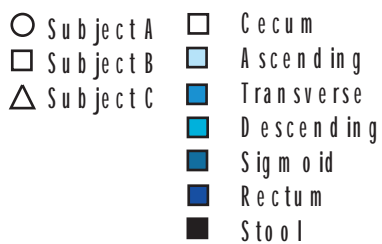

Supplement: pnas_0504978102_2.pdf [file pnas_0504978102_2.pdf]

A

## Unweighted UniFrac

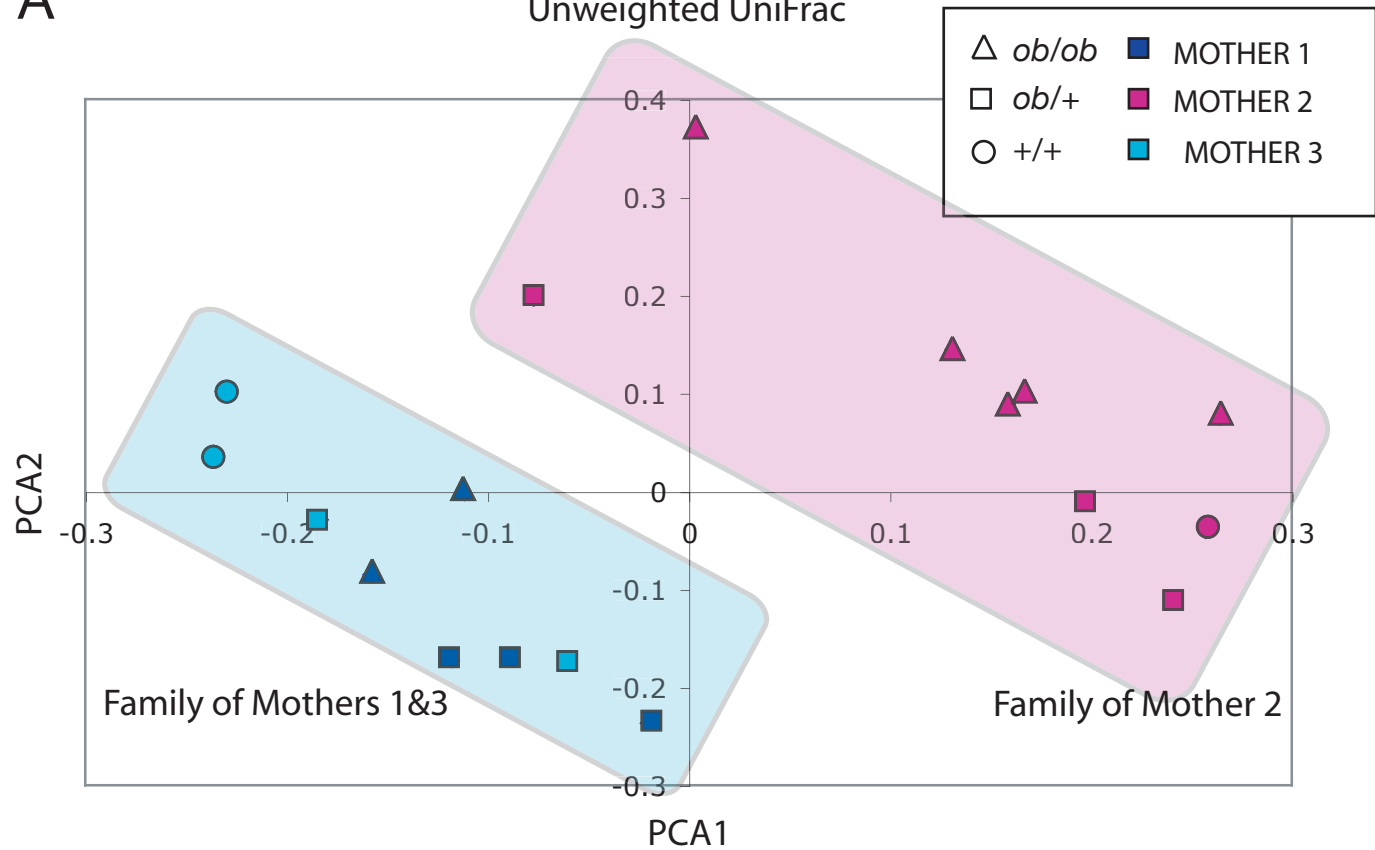

B

## Weighted UniFrac

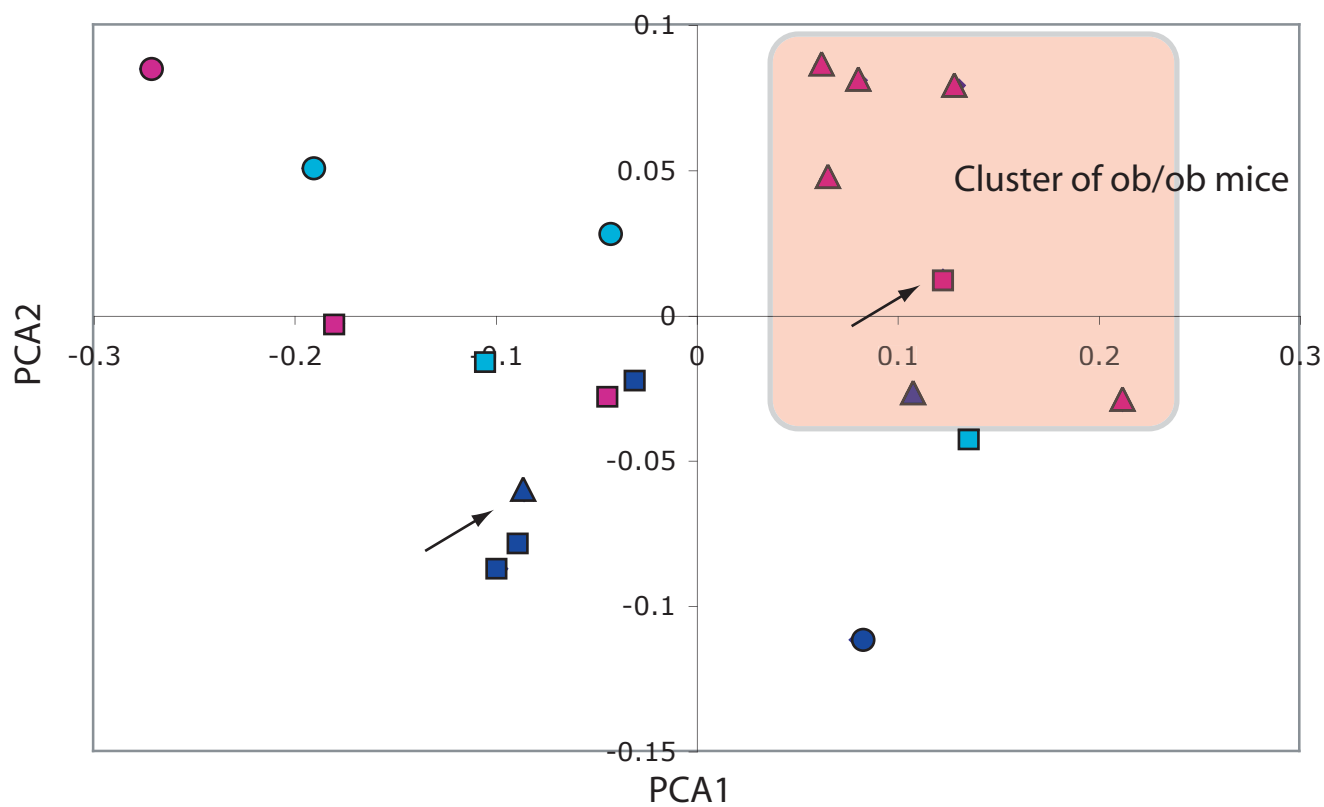

Supplement: pnas_0504978102_3.pdf [file pnas_0504978102_3.pdf]
